# Supplementary figures and images for: HPV genoprevalence and HPV knowledge in young women in Mongolia, five years following a pilot 4vHPV vaccination campaign
Source: PubMed Central journal article supplement — Papillomavirus Res. 2019 Jul 2;8:100175. doi: 10.1016/j.pvr.2019.100175 (PMC6658929; doi:10.1016/j.pvr.2019.100175), 2019-07-02

# Supplementary material 1: flowchart of study design and results included for analysis

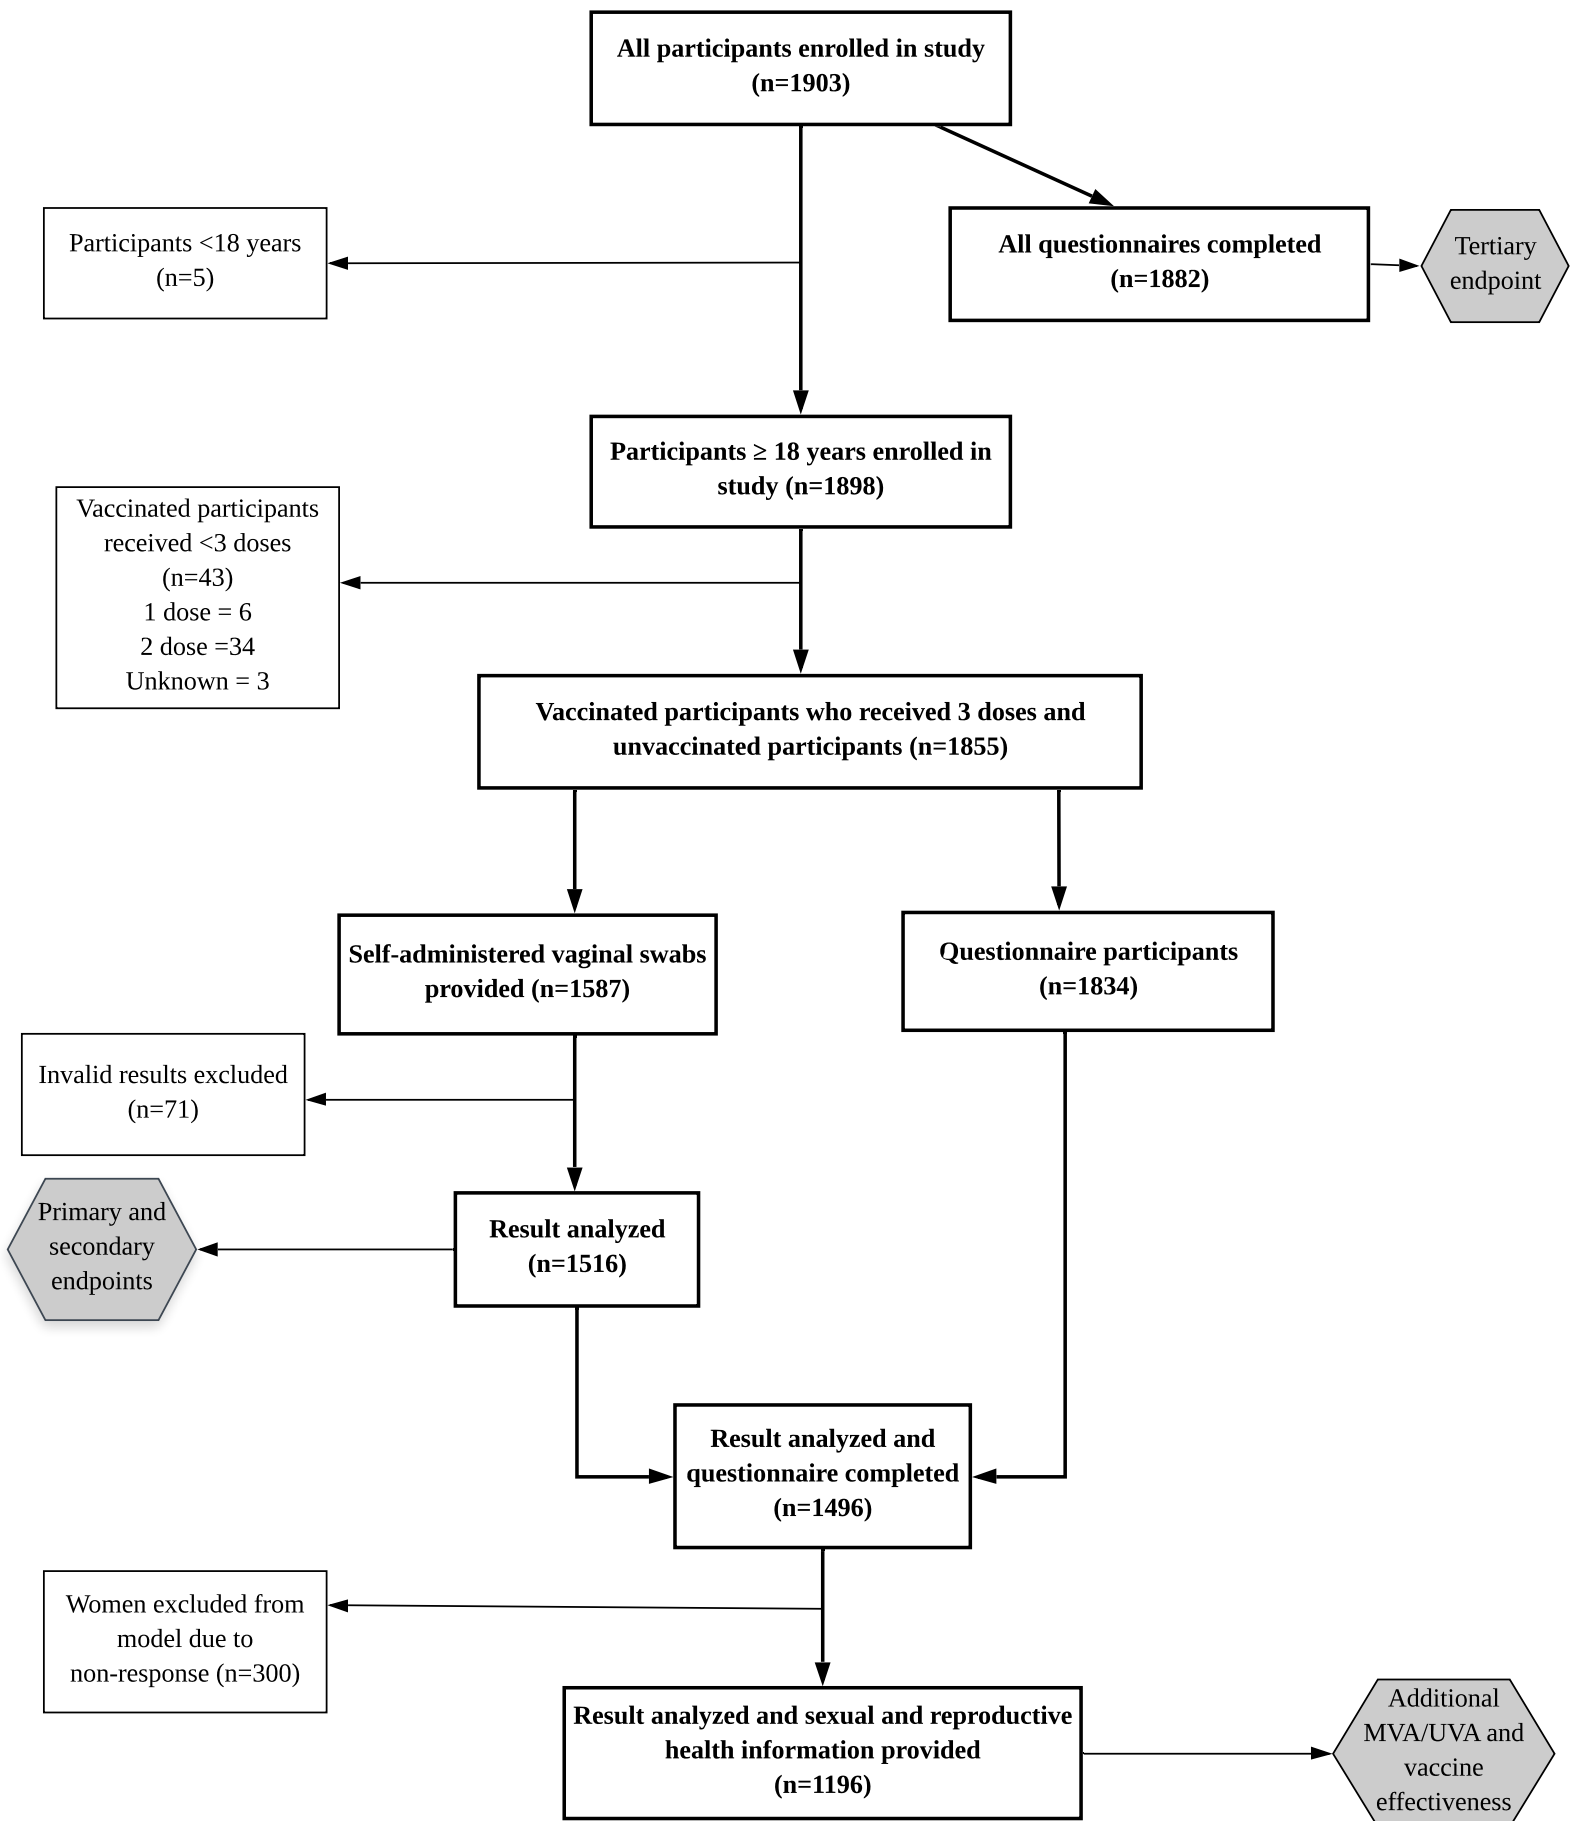

Supplement: mmc2.pdf [file mmc2.pdf]
